# Supplementary material
Source: MDPI journal article supplement (https://www.mdpi.com/1999-4893/9/2/33)
Supplement: s1 [file s1]

**Daniel R. Jeske<sup>1</sup>, Jeffrey Longmate<sup>2</sup>, Vani Katheria<sup>3</sup> and Arti Hurria<sup>3</sup>**

| Question | Previous Answers | Presumed Answer |
|----------|------------------|-----------------|
| 2        | 0                | 0               |
| 3        | 00               | 0               |
| 3        | 10               | 0               |
| 4        | 000              | 0               |
| 5        | 0000             | 0               |
| 5        | 1000             | 0               |
| 6        | 00000            | 0               |
| 8        | 0000000          | 0               |
| 8        | 1000000          | 0               |
| 9        | 00000000         | 0               |
| 9        | 10000000         | 0               |
| 10       | 100000000        | 0               |
| *10      | 000000000        | 0               |

**Table S2.** Function Level (Reverse Ordering) CQs to Eliminate (Budget is 1%).

| Question | Previous Answers | Presumed Answer |
|----------|------------------|-----------------|
| 1        | NA               | 0               |
| 3        | 01               | 1               |
| 4        | 001              | 1               |
| 4        | 011              | 1               |
| 5        | 0000             | 0               |
| 6        | 00000            | 0               |
| 6        | 00010            | 0               |
| 6        | 00110            | 0               |
| 8        | 0000000          | 0               |

[illegible]

**Table S4.** Function Level (Inside Out Ordering) CQs to Eliminate (Budget is 1%).

| Question | Previous Answers | Presumed Answer |
|----------|------------------|-----------------|
| 2        | 0                | 0               |
| 3        | 00               | 0               |
| 5        | 0000             | 0               |
| 5        | 1000             | 0               |
| 6        | 00000            | 0               |
| 6        | 10000            | 0               |
| 6        | 10010            | 0               |
| 7        | 000000           | 0               |
| 7        | 100000           | 0               |
| 8        | 0000000          | 0               |
| 8        | 1000000          | 0               |
| 8        | 1001001          | 0               |
| 9        | 00000000         | 0               |
| 10       | 000000000        | 0               |
| 10       | 100000000        | 0               |

**Table S5.** Functional Activities (Inside Out Order) and their Mined Branching Rules (Budget is 1%), (0 = not limited or limited a little, 1 = limited a lot).

| Activity                                                                                            | Rule 1 |   | Rule 2 |   | Rule 3 |   | Rule 4 |   | Rule 5 |   | Rule 6 |   |
|-----------------------------------------------------------------------------------------------------|--------|---|--------|---|--------|---|--------|---|--------|---|--------|---|
|                                                                                                     | 0      | 1 | 0      | 1 | 0      | 1 | 0      | 1 | 0      | 1 | 0      | 1 |
| 1. Vigorous activities, such as running, lifting heavy objects or participating in strenuous sports | 0      | 1 | 0      | 1 | 0      | 1 | 0      | 1 | 0      | 1 | 0      | 1 |
| 2. Lifting or carrying groceries                                                                    | 0      | 1 | 0      | 1 | 0      | 1 | 0      | 1 | 0      | 1 | 0      | 1 |
| 3. Climbing one flight of stairs                                                                    | 0      | 1 | 0      | 1 | 0      | 1 | 0      | 1 | 0      | 1 | 0      | 1 |
| 4. Walking more than one mile                                                                       | 0      | 1 | 0      | 1 | 0      | 1 | 0      | 1 | 0      | 1 | 0      | 1 |
| 5. Walking one block                                                                                | 0      | 1 | 0      | 1 | 0      | 1 | 0      | 1 | 0      | 1 | 0      | 1 |
| 6. Bathing or dressing yourself                                                                     | 0      | 1 | 0      | 1 | 0      | 1 | 0      | 1 | 0      | 1 | 0      | 1 |
| 7. Walking several blocks                                                                           | 0      | 1 | 0      | 1 | 0      | 1 | 0      | 1 | 0      | 1 | 0      | 1 |
| 8. Bending, kneeling or stooping                                                                    | 0      | 1 | 0      | 1 | 0      | 1 | 0      | 1 | 0      | 1 | 0      | 1 |
| 9. Climbing several flights of stairs                                                               | 0      | 1 | 0      | 1 | 0      | 1 | 0      | 1 | 0      | 1 | 0      | 1 |
| 10. Moderate activities, such as moving a table, pushing a vacuum cleaner, bowling or golfing       | 0      | 1 | 0      | 1 | 0      | 1 | 0      | 1 | 0      | 1 | 0      | 1 |
